# Supplementary material
Source: PubMed Central journal article supplement (PMC11389032)
Supplement: PBI-15-306-s002.pdf [file PBI-15-306-s002.pdf]

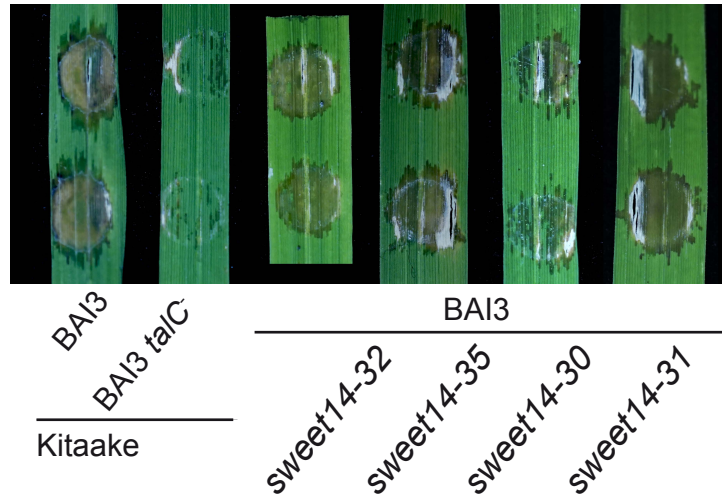

**Supplementary Figure 1**

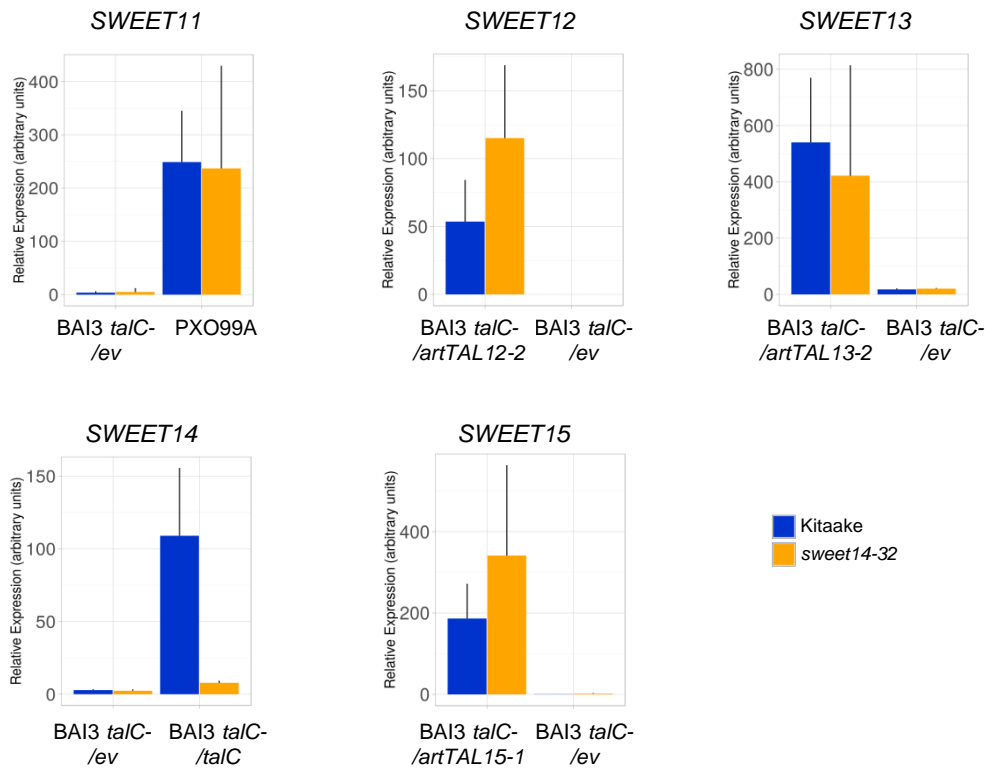

**Supplementary Figure 2**
